# Supplementary material for: Dithiolato- and halogenido-bridged nickel–iron complexes related to the active site of [NiFe]-H2ases: preparation, structures, and electrocatalytic H2 production
Source: Royal Society of Chemistry journal article supplement (doi:10.1039/c7dt02203d), 2017-01-01
Supplement: c7dt02203d1.pdf [file c7dt02203d1.pdf]

## Supporting Information

### Dithiolato- and halogenido-bridged nickel-iron complexes related to the active site of [NiFe]-H<sub>2</sub>ases: preparation, structures, and electrocatalytic H<sub>2</sub> production

Li-Cheng Song,<sup>\*a,b</sup> Xiao-Feng Han,<sup>a</sup> Wei Chen,<sup>a</sup> Jia-Peng Li,<sup>a</sup>  
and Xu-Yong Wang<sup>a</sup>

<sup>a</sup>Department of Chemistry, State Key Laboratory of Elemento-Organic Chemistry, College of Chemistry and <sup>b</sup>Collaborative Innovation Center of Chemical Science and Engineering (Tianjin), Nankai University, Tianjin 300071, China

#### Contents:

1. IR and <sup>1</sup>H ( <sup>31</sup>P) NMR spectra of 3a (Fig. S1–S3)
2. IR and <sup>1</sup>H ( <sup>31</sup>P) NMR spectra of 4b (Fig. S4–S6)
3. Molecular structure of 3b and 4b (Fig. S7 and S8)
4. IR and <sup>1</sup>H ( <sup>31</sup>P, <sup>11</sup>B, <sup>19</sup>F) NMR spectra of 5b (Fig. S9–S13)
5. IR and <sup>1</sup>H ( <sup>31</sup>P, <sup>11</sup>B, <sup>19</sup>F) NMR spectra of 6a (Fig. S14–S18)
6. IR and <sup>1</sup>H ( <sup>31</sup>P, <sup>11</sup>B, <sup>19</sup>F) NMR spectra of 7a (Fig. S19–S23)
7. Bulk electrolysis for the two-electron reduction of [CpFe(CO)<sub>2</sub>]<sub>2</sub> and the one-electron reductions of 5a–7a (Fig. S24)
8. Bulk electrolysis for the two-electron reduction of [CpFe(CO)<sub>2</sub>]<sub>2</sub> and the one-electron oxidations of 5a–7a (Fig. S25)
9. Plots of *i*<sub>p</sub> versus *v*<sup>1/2</sup> for the reduction peaks of 5a–7a (Fig. S26)
10. Cyclic voltammograms and overpotential determinations of 6a,b, 7a,b with Cl<sub>2</sub>CHCO<sub>2</sub>H in MeCN (Fig. S27)
11. TOF calculations
12. References

# 1. IR and $^1\text{H}$ ( $^{31}\text{P}$ ) NMR spectra of 3a

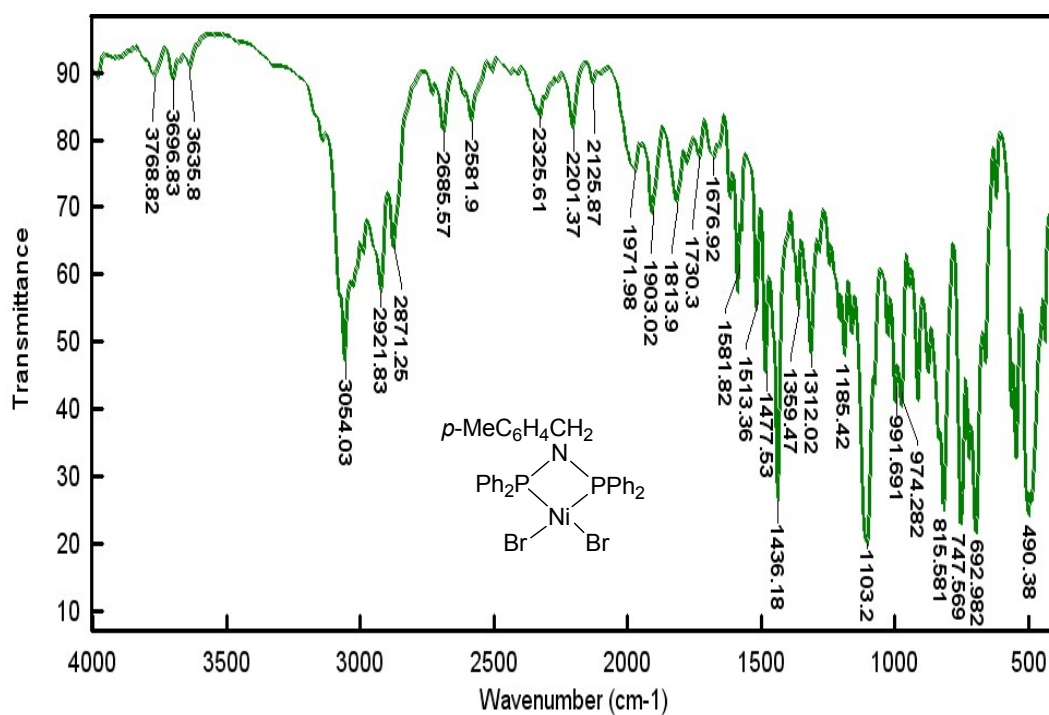

Fig. S1 IR spectrum of 3a.

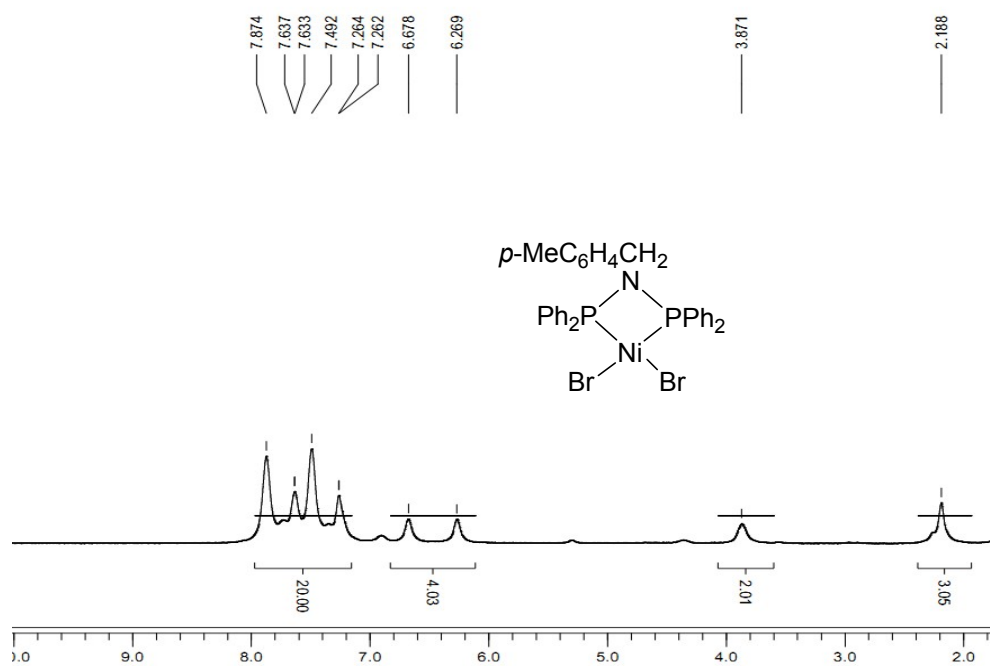

Fig. S2  $^1\text{H}$  NMR spectrum of 3a.

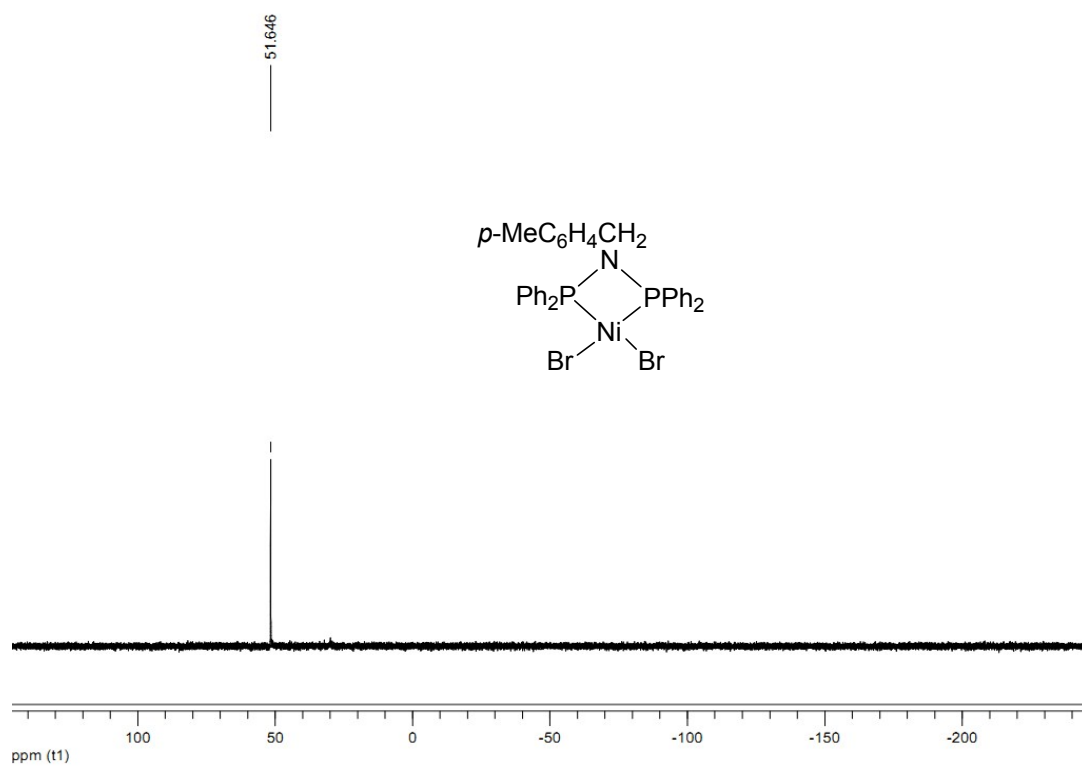

**Fig. S3**  $^{31}\text{P}$  NMR spectrum of **3a**.

## 2. IR and $^1\text{H}$ ( $^{31}\text{P}$ ) NMR spectra of **4b**

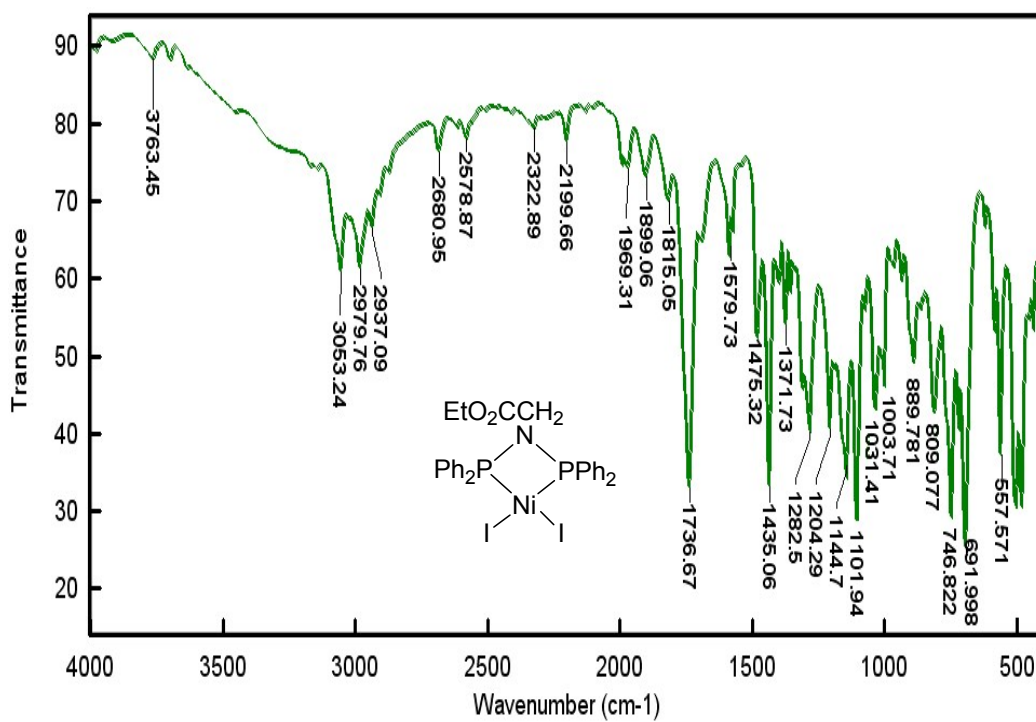

Fig. S4 IR spectrum of **4b**.

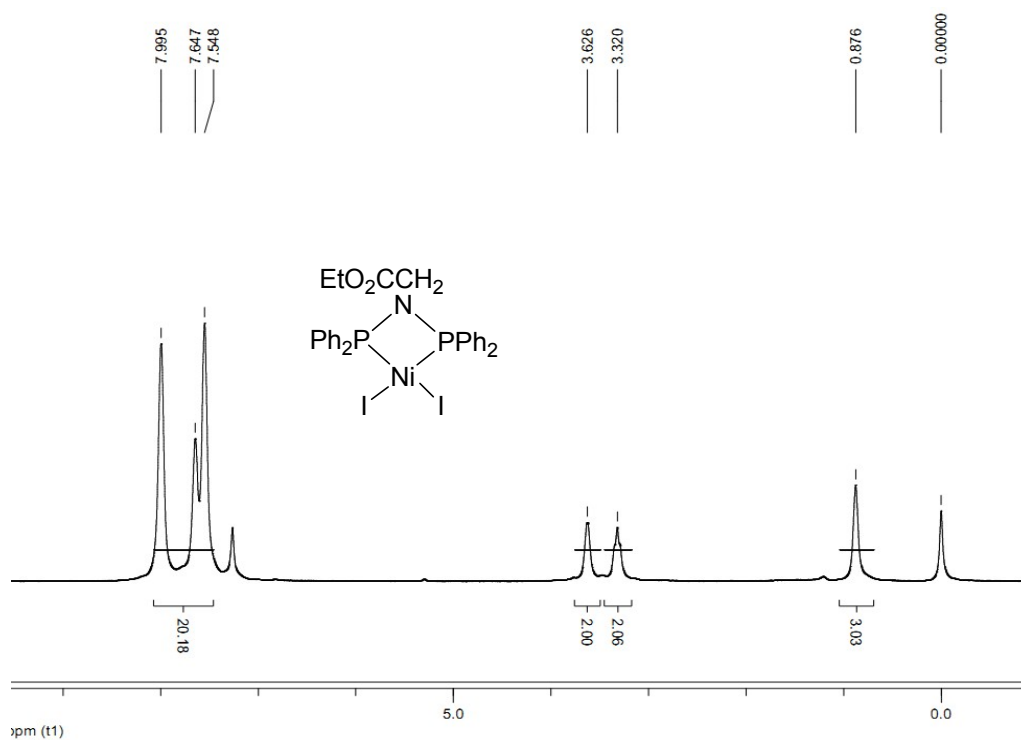

Fig. S5  $^1\text{H}$  NMR spectrum of **4b**.

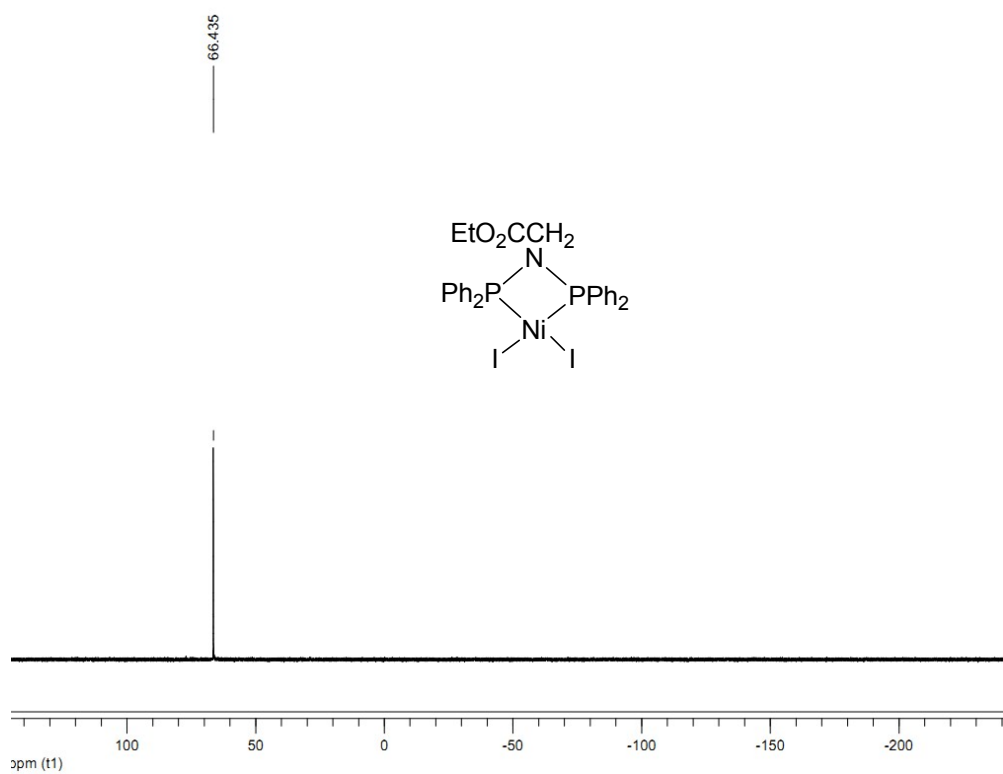

**Fig. S6**  $^{31}\text{P}$  NMR spectrum of **4b**.

### 3. Molecular structure of 3b and 4b.

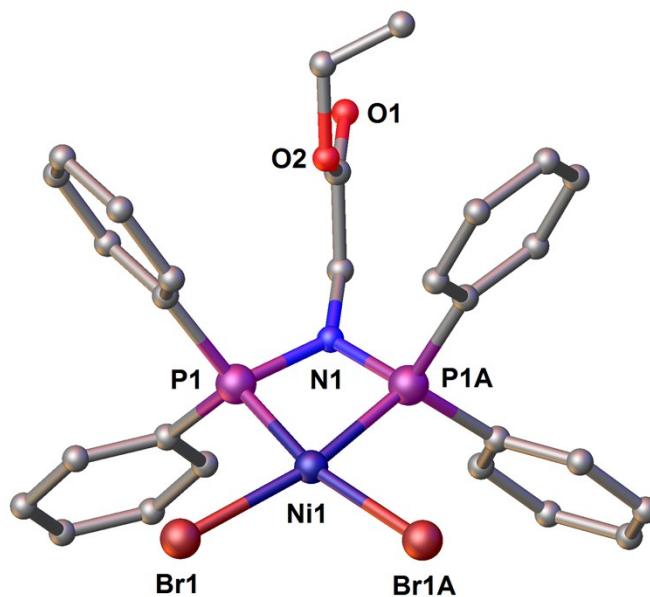

**Fig. S7** Molecular structure of **3b**. Hydrogen atoms are omitted for clarity. Selected interatomic distances (Å) and angles (°) : Ni1–P1 2.1257 (8), Ni1–Br1 2.3393(5), P1–N1 1.698(2); P1–Ni1–P1A 73.75(4), P1–Ni1–Br1 93.23(2), Br1–Ni1–Br1A 99.80(3), P1–N1–P1A 97.36(17).

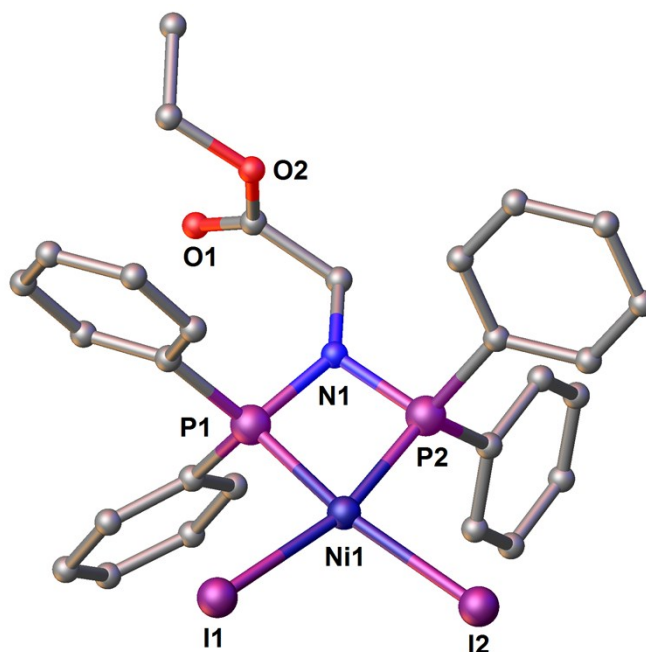

**Fig. S8** Molecular structure of **4b**. Hydrogen atoms are omitted for clarity. Selected interatomic distances (Å) and angles (°) : Ni1–P1 2.1366(8), Ni1–P2 2.1285(8), Ni1–I1 2.5150(5), Ni1–I2 2.5094(5), P1–N1 1.699(2), P2–N1 1.699(2); P1–Ni1–P2 74.00(3), P1–Ni1–I1 92.66(3), I1–Ni1–I2 100.178(18), P1–N1–P2 98.12(10).

4. IR and  $^1\text{H}$  ( $^{31}\text{P}$ ,  $^{11}\text{B}$ ,  $^{19}\text{F}$ ) NMR spectra of **5b**.

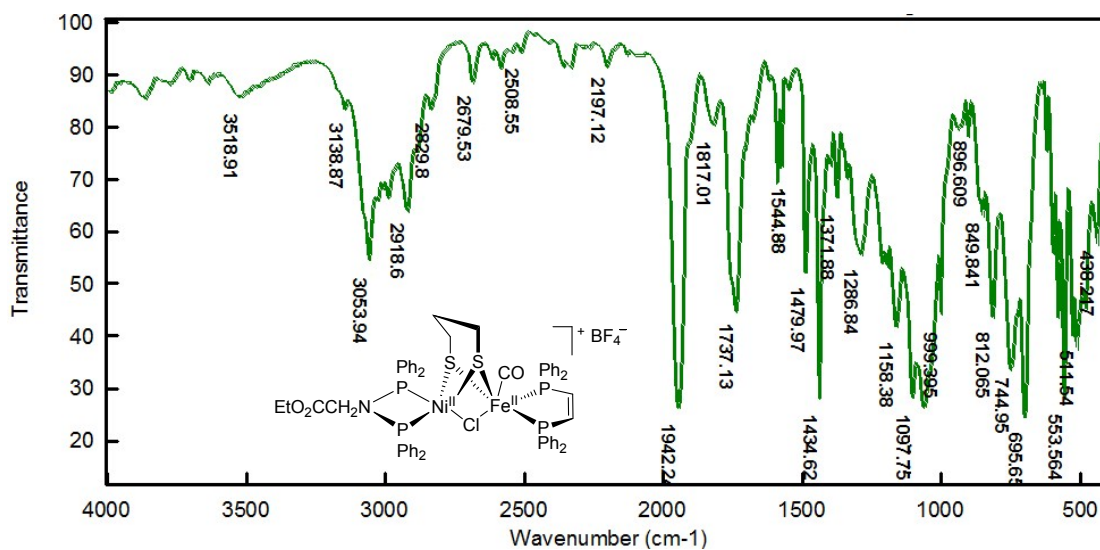

Fig. S9 IR spectrum of **5b**

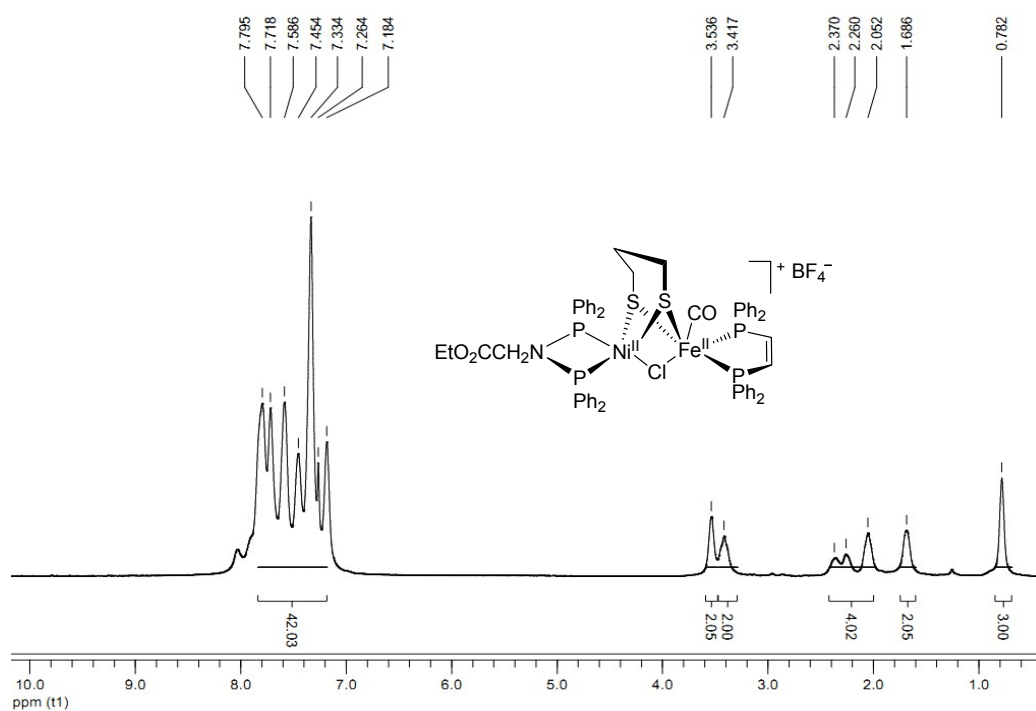

Fig. S10  $^1\text{H}$  NMR spectrum of **5b**.

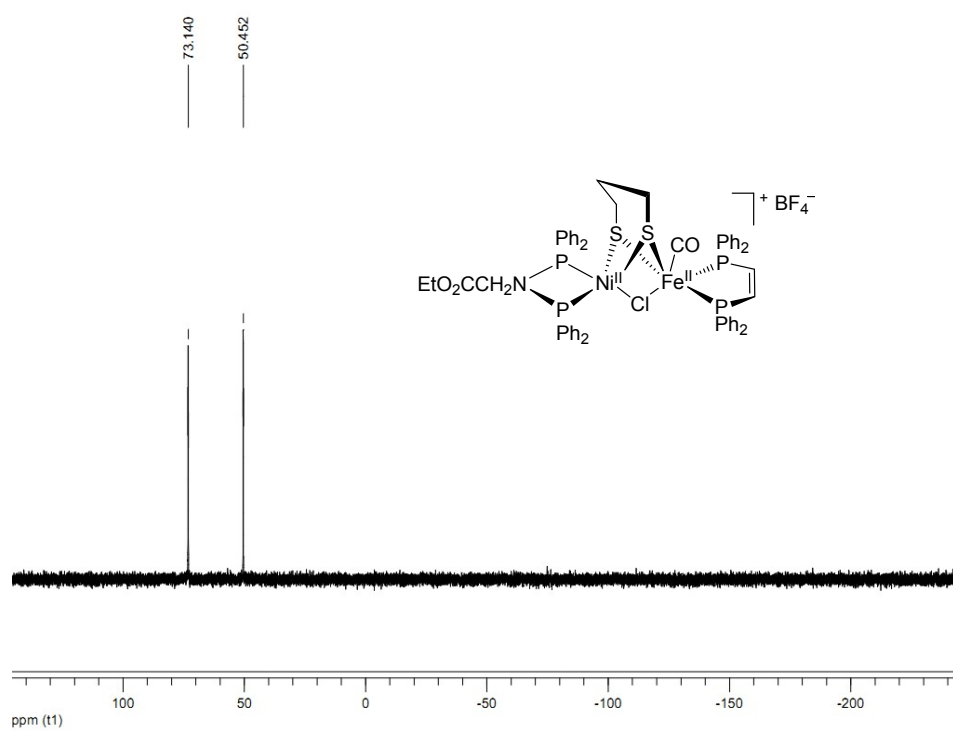

**Fig. S11** <sup>31</sup>P NMR spectrum of **5b**.

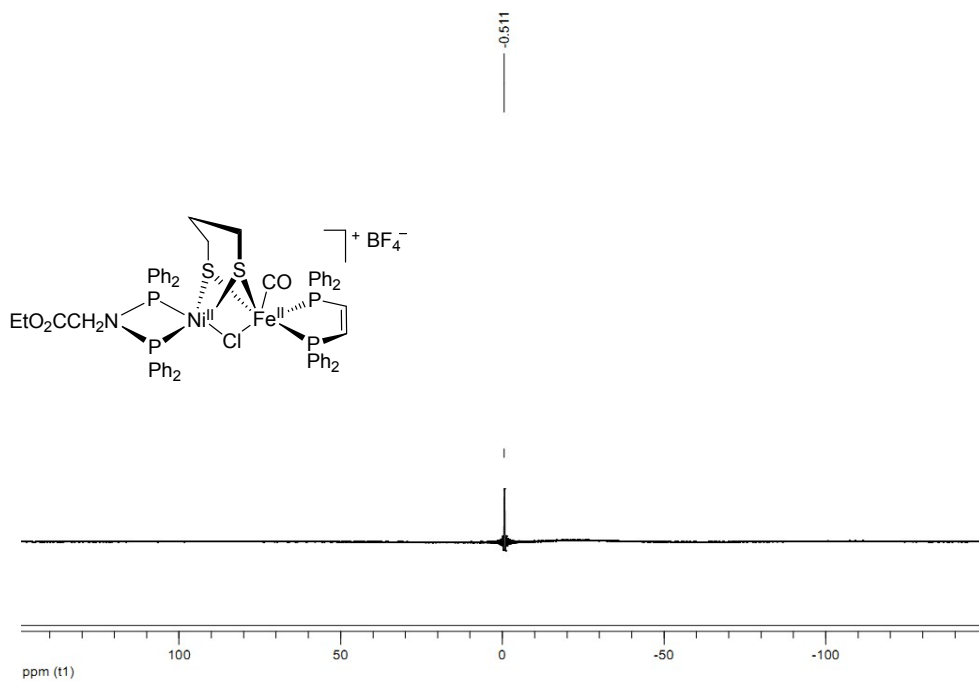

**Fig. S12** <sup>11</sup>B NMR spectrum of **5b**.



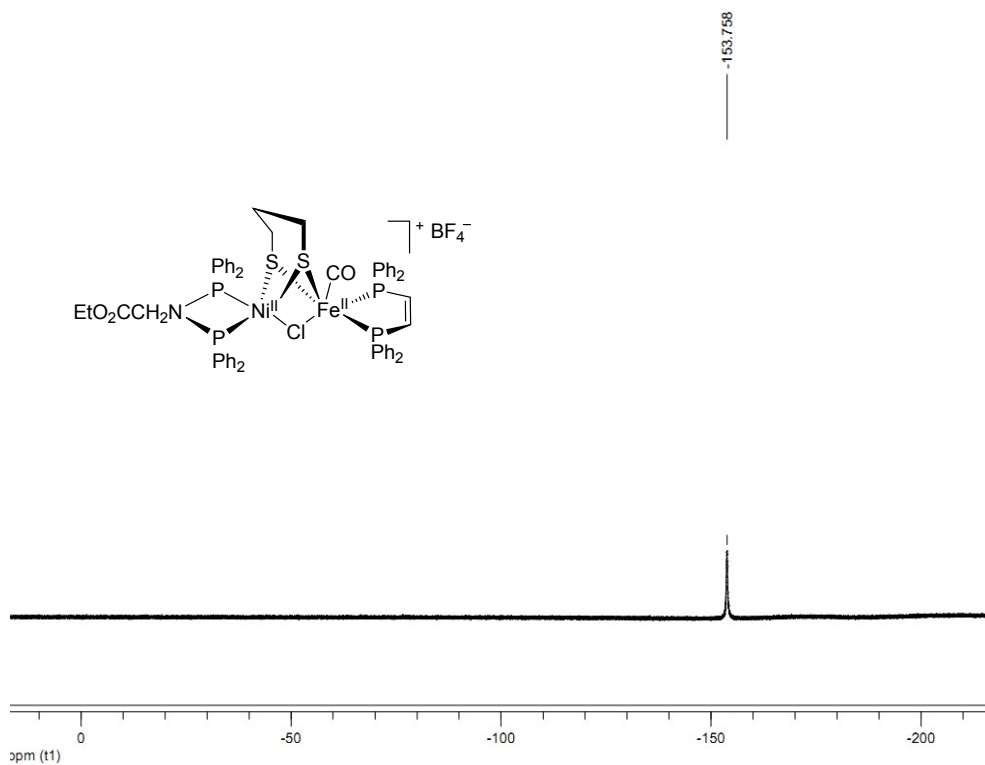

**Fig. S13**  $^{19}\text{F}$  NMR spectrum of **5b**.

## 5. IR and $^1\text{H}$ ( $^{31}\text{P}$ , $^{11}\text{B}$ , $^{19}\text{F}$ ) NMR spectra of **6a**

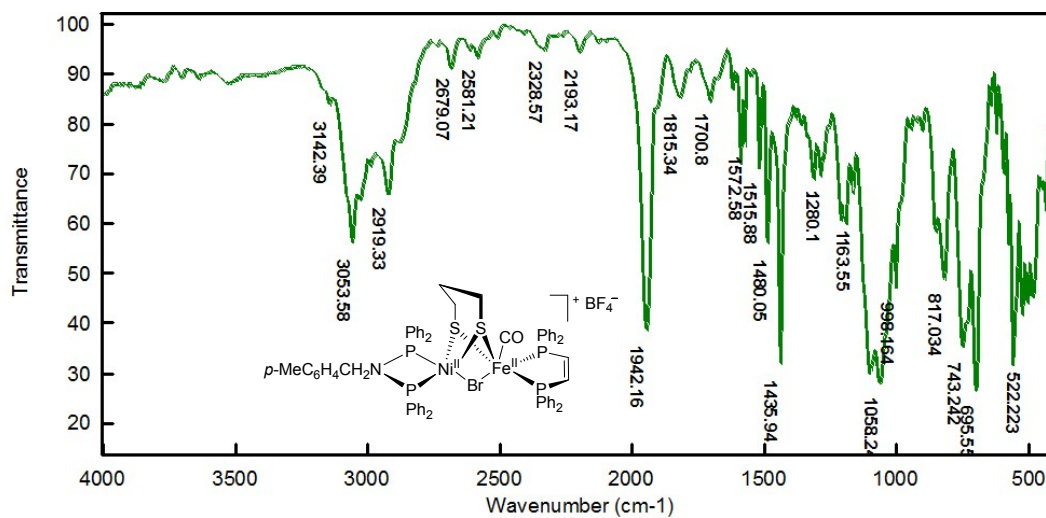

**Fig. S14** IR spectrum of **6a**.

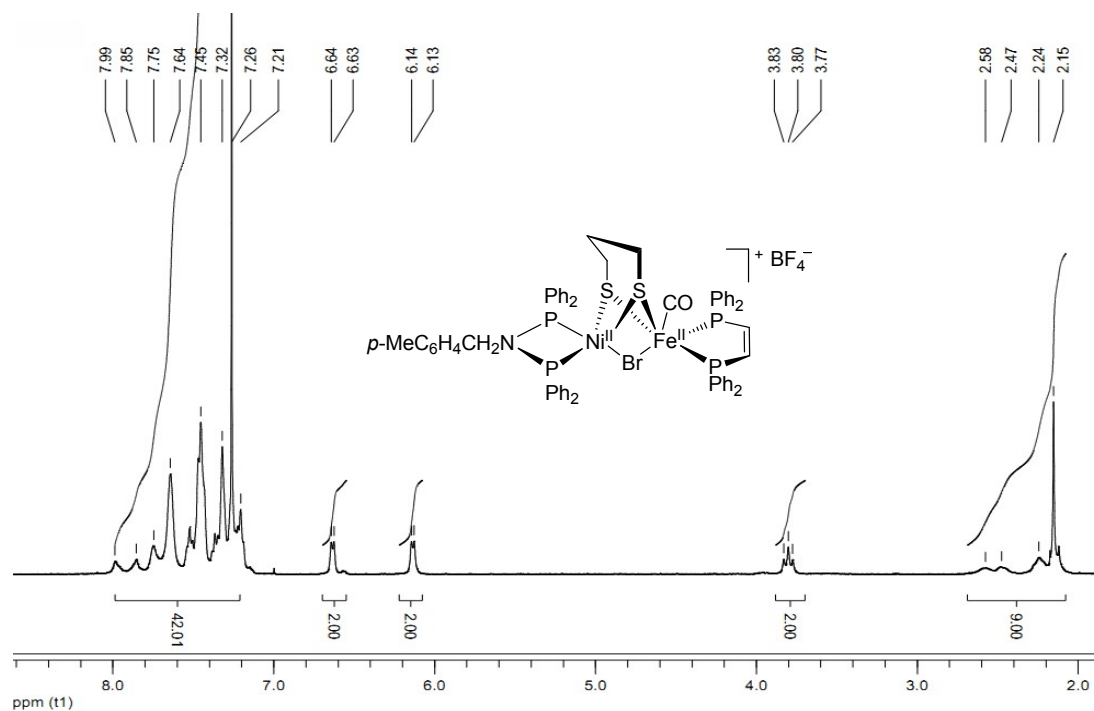

**Fig. S15**  $^1\text{H}$  NMR spectrum of **6a**.

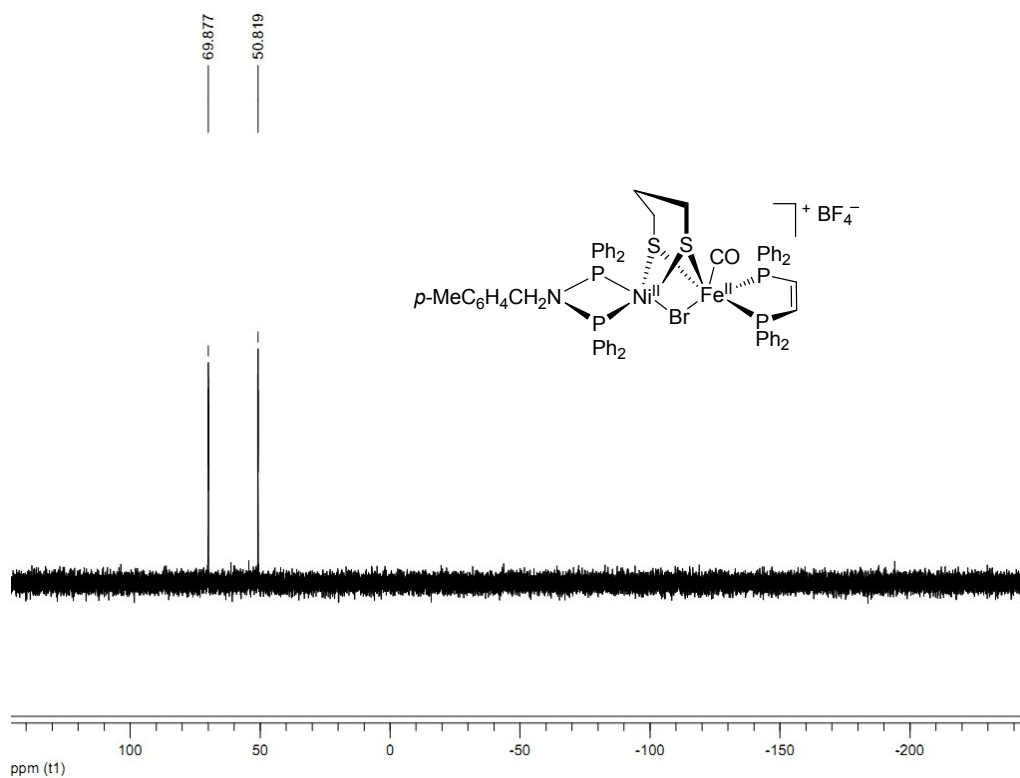

**Fig. S16** <sup>31</sup>P NMR spectrum of **6a**.

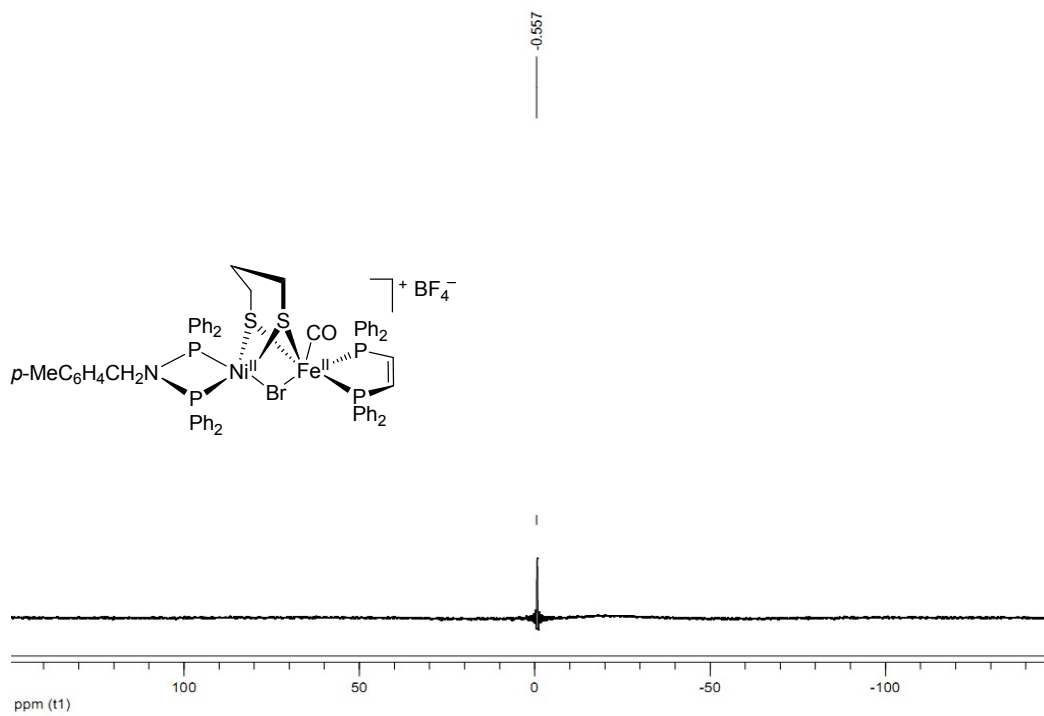

**Fig. S17** <sup>11</sup>B NMR spectrum of **6a**.

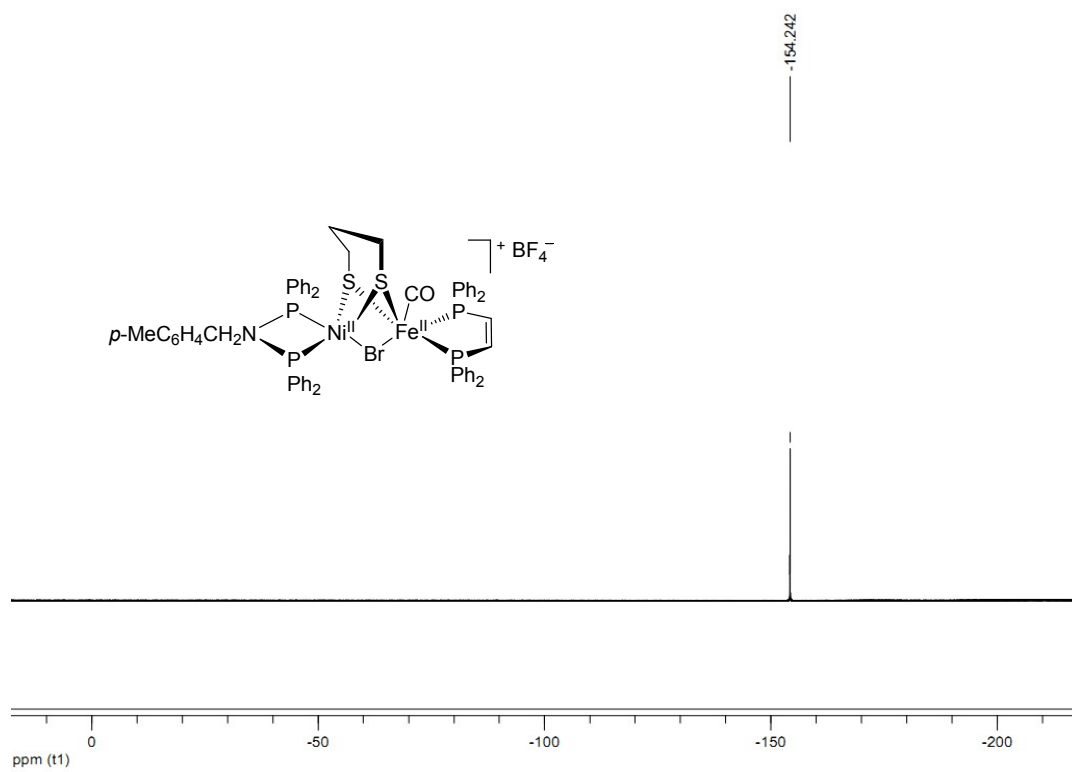

**Fig. S18**  $^{19}\text{F}$  NMR spectrum of **6a**.

## 6. IR and $^1\text{H}$ ( $^{31}\text{P}$ , $^{11}\text{B}$ , $^{19}\text{F}$ ) NMR spectra of **7a**

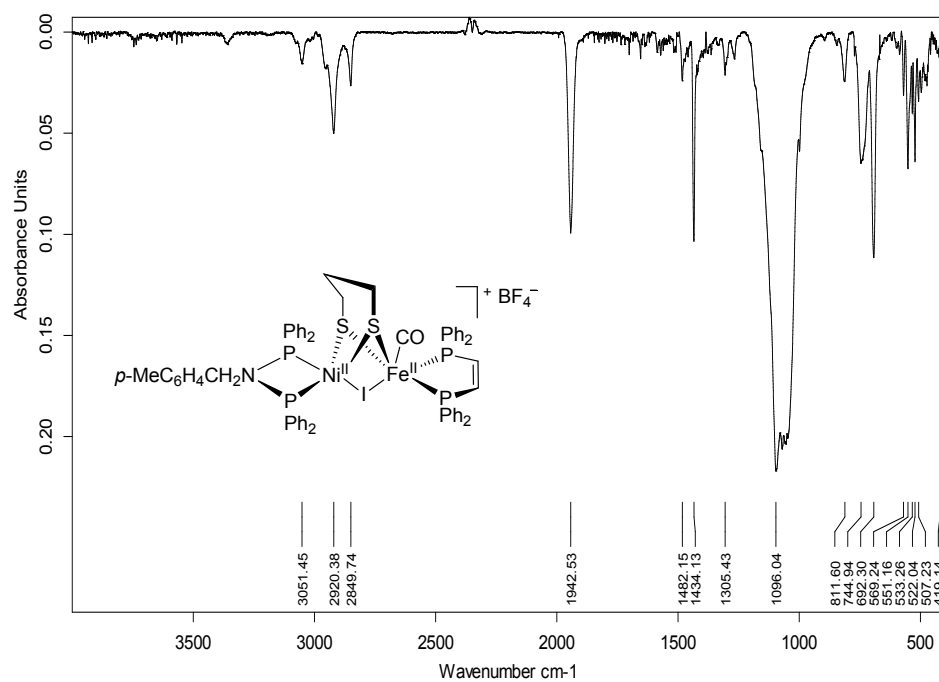

**Fig. S19** IR spectrum of **7a**.

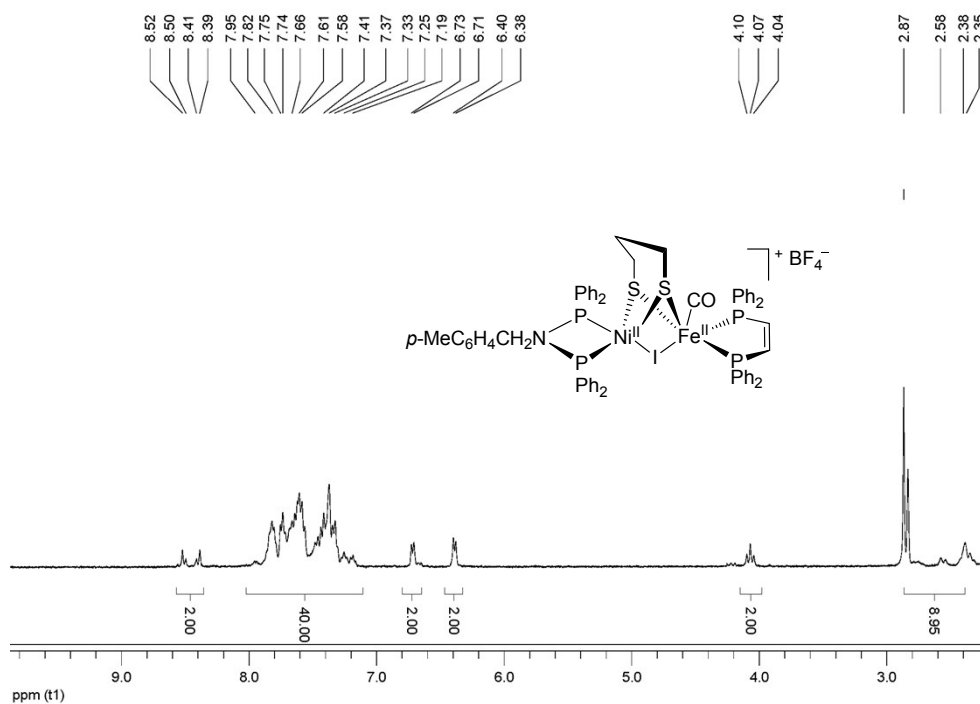

**Fig. S20**  $^1\text{H}$  NMR spectrum of **7a**.

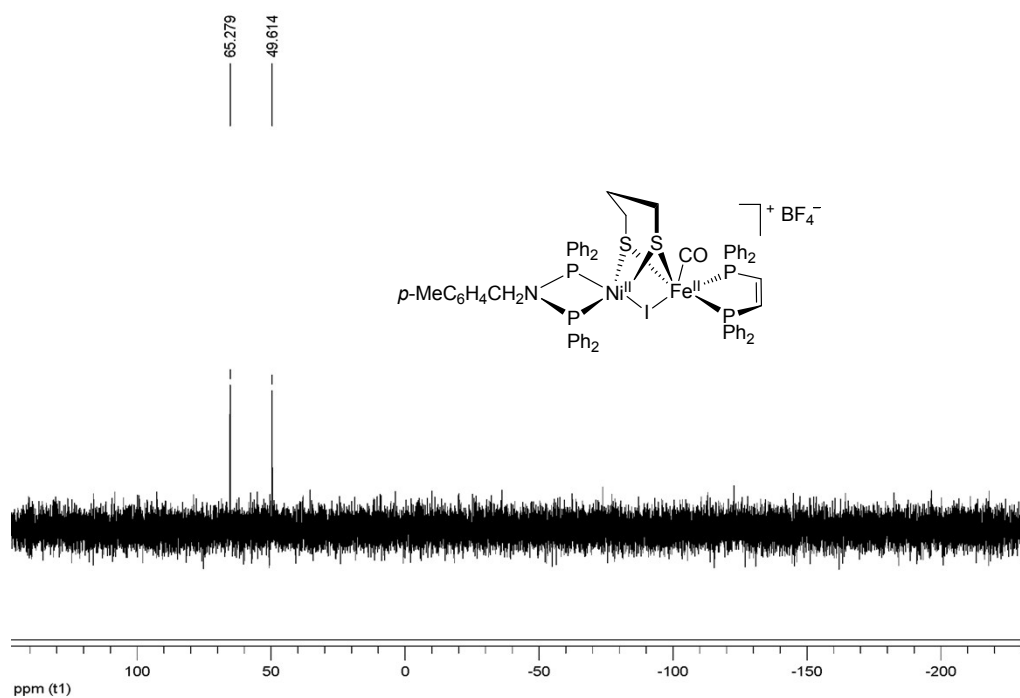

**Fig. S21**  $^{31}\text{P}$  NMR spectrum of **7a**.

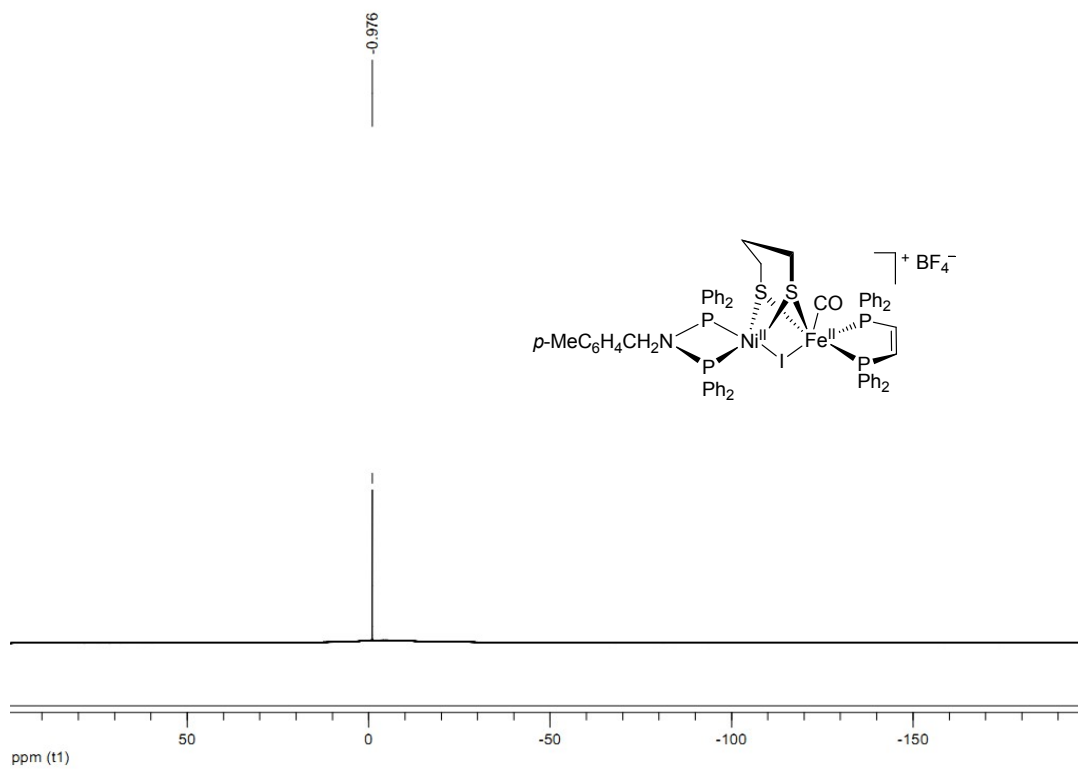

**Fig. S22**  $^{11}\text{B}$  NMR spectrum of **7a**.

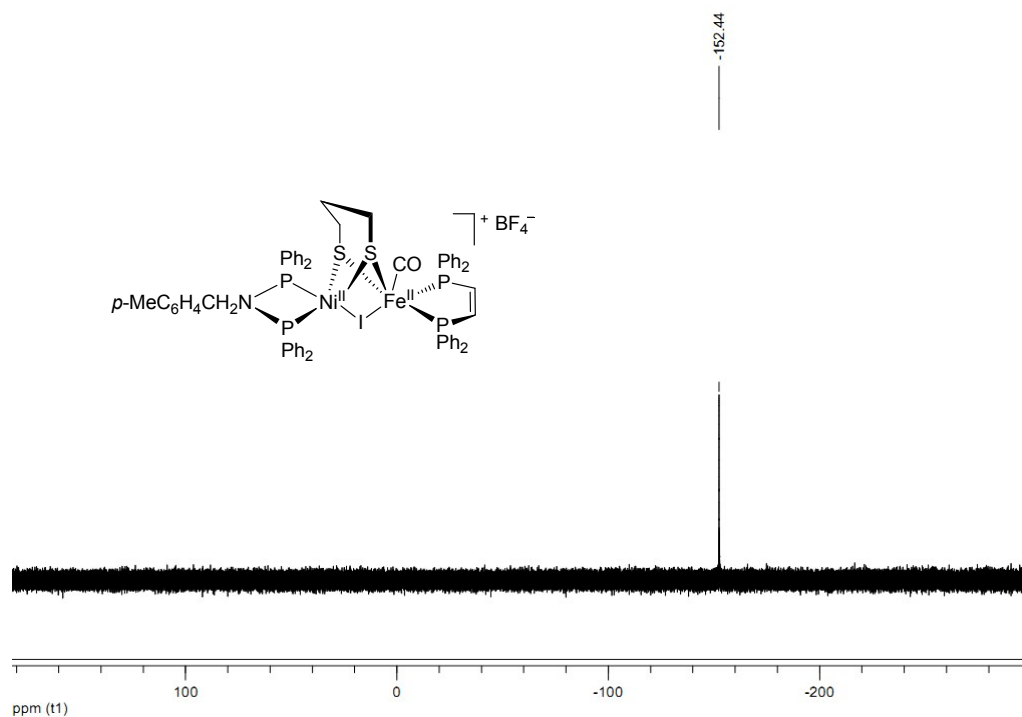

**Fig. S23**  $^{19}\text{F}$  NMR spectrum of **7a**.

## 7. Bulk electrolysis for the two-electron reduction of $[\text{CpFe}(\text{CO})_2]_2$ and the one-electron reductions of **5a–7a**.

The reduction events for **5a–7a** is a one-electron process since their final Q values determined by bulk electrolysis are close to half that of the known two-electron reduction process of dimer  $[\text{CpFe}(\text{CO})_2]_2$ .<sup>1,2</sup>

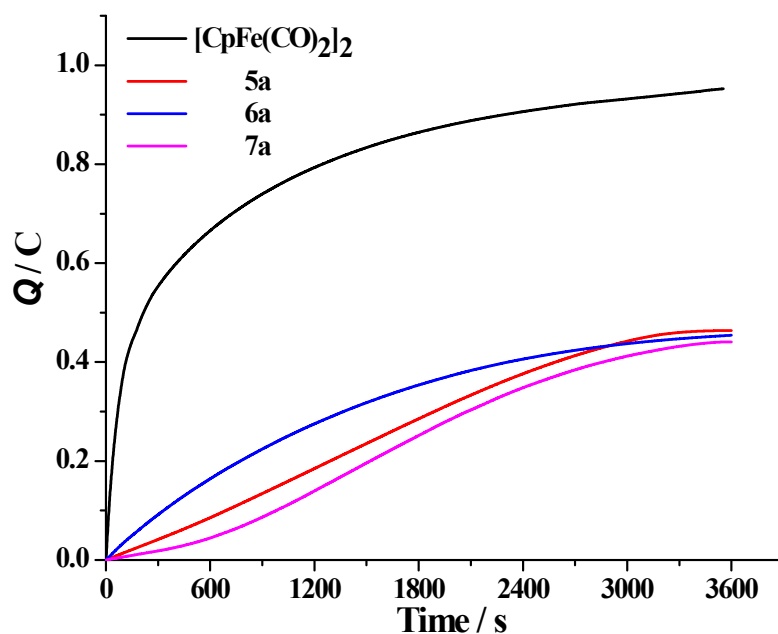

**Fig. S24** Bulk electrolysis for the two-electron reduction of  $[\text{CpFe}(\text{CO})_2]_2$  and the one-electron reductions of **5a–7a**.



## 8. Bulk electrolysis for the two-electron reduction of $[\text{CpFe}(\text{CO})_2]_2$ and the one-electron oxidations of **5a–7a**.

The oxidation events for **5a–7a** are also a one-electron process since the final  $Q$  values determined by bulk electrolysis are close to half that of the known two-electron reduction of dimer  $[\text{CpFe}(\text{CO})_2]_2$ .<sup>1,2</sup>

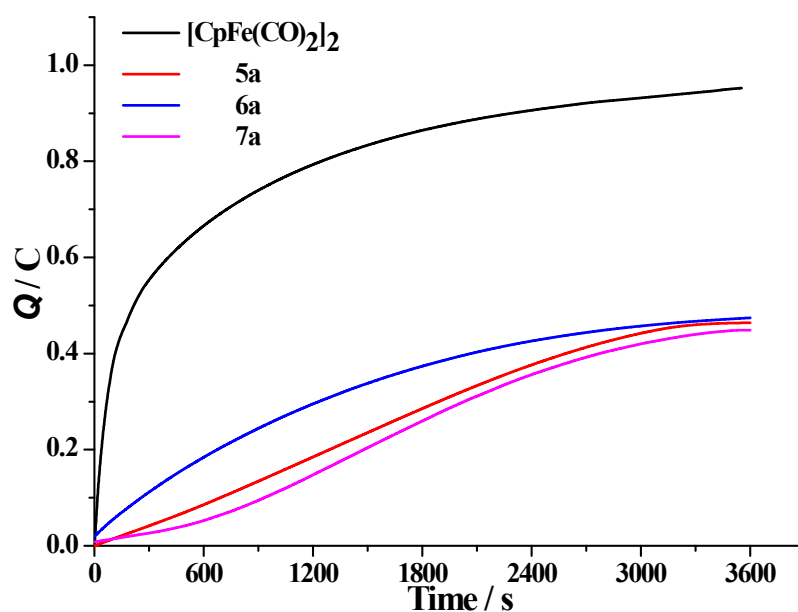

**Fig. S25** Bulk electrolysis for the two-electron reduction of  $[\text{CpFe}(\text{CO})_2]_2$  and the one-electron oxidations of **5a–7a**.

9. Plots of  $i_p$  versus  $v^{1/2}$  for the reduction peaks of 5a–7a.

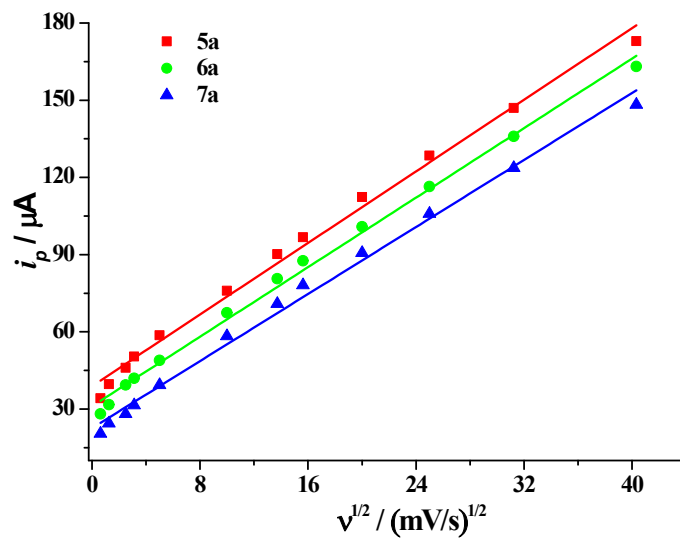

Fig. S26 Plots of  $i_p$  versus  $v^{1/2}$  for the reduction peaks of 5a (■), 6a(●)and 7a(▲).

**10. Cyclic voltammograms and overpotential determinations of 6a,b and 7a,b with Cl<sub>2</sub>CHCO<sub>2</sub>H in MeCN.**

Since the  $pK_a$  and the standard redox potential of Cl<sub>2</sub>CHCO<sub>2</sub>H in MeCN ( $pK_a^{\text{MeCN}} = 13.2$ ,  $E_{\text{H}^+/\text{H}_2}^0 = -0.14 \text{ V}$ )<sup>3</sup> are known, the equilibrium potential ( $E_{\text{HA}}^0 = -0.92 \text{ V vs Fc/Fc}^+$ ) can be calculated according to eq.S1 using Evans' relationship.<sup>3</sup> The overpotentials of the electrocatalytic proton reductions catalyzed by **6a,b** and **7a,b** were measured using eq.S2 from the potential at 0.5 ( $i_{pc}$ ), where  $i_{pc}$  is the cathodic peak current in the cyclic voltammogram recorded after addition of 40 mM or 68 mM of Cl<sub>2</sub>CHCO<sub>2</sub>H.

$$E_{\text{HA}}^0 = E_{\text{H}^+/\text{H}_2}^0 - (2.303RT/F)pK_{a,\text{HA}} \quad \text{eq.S1}$$

$$\text{overpotential} = |E_{\text{HA}}^0 - E_{\text{cat}/2}| \quad \text{eq.S2}$$

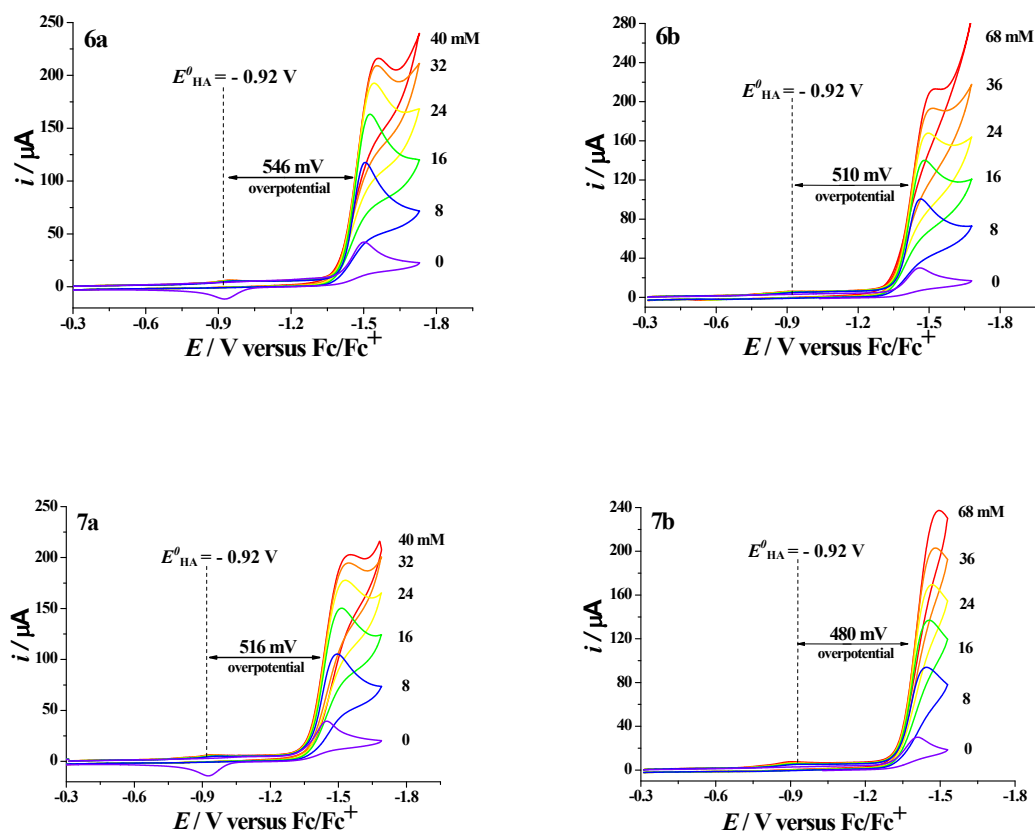

**Fig. S27** Cyclic voltammograms of **6a,b** and **7a,b** (1.0 mM) with varying amount of Cl<sub>2</sub>CHCO<sub>2</sub>H (denoted on right) in 0.1 M *n*-Bu<sub>4</sub>NPF<sub>6</sub>/MeCN at a scan rate of 0.1 Vs<sup>-1</sup>.

## 11. TOF calculations

The turnover frequency (TOF) was calculated using a ratio of  $i_{\text{cat}}/i_p$  (eqs. S3 and S4), where  $i_{\text{cat}}$  is the peak current of the reduction wave in the presence of acid and  $i_p$  is the peak current in the absence of acid. The value of  $i_{\text{cat}}/i_p$  is in the regime where the catalytic rate is independent of  $[\text{H}]^+$ .<sup>4</sup>

$$i_{\text{cat}}/i_p = (n/0.446)(RTk/Fv)^{1/2} \quad \text{eq. S3}$$

$$\text{TOF} = 1.94v(i_{\text{cat}}/i_p)^2 \quad \text{eq. S4}$$

$n$  = number of electrons transferred                       $R$  = ideal gas constant in  $\text{K}^{-1}\text{mol}^{-1}$

$T$  = temperature in K                                               $k$  = rate constant

$v$  = scan rate in V/ s

$$\text{TOF}_{5a} = 1.94v(i_{\text{cat}}/i_p)^2 = 1.94 (\text{V}^{-1}) \times 0.1 (\text{Vs}^{-1}) \times (7.0)^2 = 9.5$$

$$\text{TOF}_{5b} = 1.94v(i_{\text{cat}}/i_p)^2 = 1.94 (\text{V}^{-1}) \times 0.1 (\text{Vs}^{-1}) \times (9.3)^2 = 16.8$$

$$\text{TOF}_{6a} = 1.94v(i_{\text{cat}}/i_p)^2 = 1.94 (\text{V}^{-1}) \times 0.1 (\text{Vs}^{-1}) \times (6.0)^2 = 7.0$$

$$\text{TOF}_{6b} = 1.94v(i_{\text{cat}}/i_p)^2 = 1.94 (\text{V}^{-1}) \times 0.1 (\text{Vs}^{-1}) \times (8.1)^2 = 12.7$$

$$\text{TOF}_{7a} = 1.94v(i_{\text{cat}}/i_p)^2 = 1.94 (\text{V}^{-1}) \times 0.1 (\text{Vs}^{-1}) \times (5.4)^2 = 5.7$$

$$\text{TOF}_{7b} = 1.94v(i_{\text{cat}}/i_p)^2 = 1.94 (\text{V}^{-1}) \times 0.1 (\text{Vs}^{-1}) \times (7.9)^2 = 12.1$$

## 12. References

- 1 L.-C. Song, B. Gai, Z.-H. Feng, Z.-Q. Du, Z.-J. Xie, X.-J. Sun and H.-B. Song, *Organometallics*, 2013, **32**, 3673-3684.
- 2 L.-C. Song, Y.-X. Wang, X.-K. Xing, S.-D. Ding, L.-D. Zhang, X.-Y. Wang and H.-T. Zhang, *Chem. Eur. J.*, 2016, **22**, 16304-16314.
- 3 G. A. N. Felton, R. S. Glass, D. L. Lichtenberger and D. H. Evans, *Inorg. Chem.*, 2006, **45**, 9181-9184.
- 4 M. E. Carroll, B. E. Barton, D. L. Gray, A. E. Mack and T. B. Rauchfuss, *Inorg. Chem.*, 2011, **50**, 9554-9563.
